EXPRESSION OF CONCERN

# Expression of Concern: The Gene Expression Analysis of Blood Reveals *S100A11* and *AQP9* as Potential Biomarkers of Infective Endocarditis

The *PLOS ONE* Editors

This article [1] has been identified as one of a series of submissions for which we have concerns about the reported research ethics approval information and the article's adherence to PLOS research ethics policies.

PLOS will be investigating these concerns in accordance with COPE guidance and journal policies. Meanwhile, the *PLOS ONE* Editors issue this Expression of Concern.

## Reference

1. Thuny F, Textoris J, Ben Amara A, El Filali A, Capo C, Habib G, et al. (2012) The Gene Expression Analysis of Blood Reveals *S100A11* and *AQP9* as Potential Biomarkers of Infective Endocarditis. *PLoS ONE* 7(2): e31490. <https://doi.org/10.1371/journal.pone.0031490> PMID: 22319637

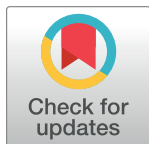

## OPEN ACCESS

**Citation:** The *PLOS ONE* Editors (2022) Expression of Concern: The Gene Expression Analysis of Blood Reveals *S100A11* and *AQP9* as Potential Biomarkers of Infective Endocarditis. *PLoS ONE* 17(12): e0278662. <https://doi.org/10.1371/journal.pone.0278662>

**Published:** December 13, 2022

**Copyright:** © 2022 The PLOS ONE Editors. This is an open access article distributed under the terms of the [Creative Commons Attribution License](https://creativecommons.org/licenses/by/4.0/), which permits unrestricted use, distribution, and reproduction in any medium, provided the original author and source are credited.
